# Supplementary material for: Talking in primary care (TIP): protocol for a cluster-randomised controlled trial in UK primary care to assess clinical and cost-effectiveness of communication skills e-learning for practitioners on patients’ musculoskeletal pain and enablement
Source: HighWire-hosted journal article supplement (doi:10.1136/bmjopen-2023-081932), 2024-03-01
Supplement: bmjopen-2023-081932supp004_data_supplement.pdf [file bmjopen-2023-081932supp004_data_supplement.pdf]

# Online Supplementary File 3: Measures and Timings

## Contents

|                                                                                                       |   |
|-------------------------------------------------------------------------------------------------------|---|
| Table 1. Patient-Reported Characteristics, Primary and Secondary Outcomes and Process Variables ..... | 2 |
| Table 2. Practitioner-Reported Characteristics, Outcomes and Process Variables.....                   | 3 |
| References.....                                                                                       | 4 |

Table 1. Patient-Reported Characteristics, Primary and Secondary Outcomes and Process Variables

| Variable                                      | Measure                                                  | Items | Measurement Timings |         |         |         |         |
|-----------------------------------------------|----------------------------------------------------------|-------|---------------------|---------|---------|---------|---------|
|                                               |                                                          |       | <-<br>7d            | <7<br>d | +1<br>m | +3<br>m | +6<br>m |
| Primary Outcomes                              |                                                          |       |                     |         |         |         |         |
| Pain intensity (pain sample)                  | Pain intensity subscale from the BPI <sup>1</sup>        | 4     | x                   | x       | x       | x       | x       |
| Patient enablement                            | Modified PEI <sup>2</sup>                                | 6     |                     | x       | x       | x       | x       |
| Secondary Outcomes                            |                                                          |       |                     |         |         |         |         |
| Patient global impression of symptom severity | Single item <sup>3</sup>                                 | 1     | x                   | x       | x       | x       | x       |
| Patient global impression of symptom change   | Single item <sup>3</sup>                                 | 1     |                     | x       | x       | x       | x       |
| Pain interference                             | Pain interference subscale from the BPI <sup>1</sup>     | 7     |                     |         | x       |         | X       |
| Patient satisfaction                          | MISS for UK general practice <sup>4</sup>                | 21    |                     | x       |         |         |         |
| Adverse events                                | Bespoke self-report item                                 | 1     |                     |         | x       | x       | x       |
| Health Economics                              |                                                          |       |                     |         |         |         |         |
| Health-related quality of life                | EQ-5D-5L and EQ-VAS <sup>5</sup>                         | 6     | x                   |         | x       |         | x       |
| Capability wellbeing                          | ICECAP-A <sup>6 7</sup>                                  | 5     | x                   |         | x       |         | x       |
| Healthcare utilization                        | ModRUM core module <sup>8</sup>                          | 12    |                     | x       |         | x       | x       |
| Prescribed medications                        | ModRUM depth questions <sup>8</sup>                      | 1     |                     |         |         | x       | x       |
| Personal expenses                             | Bespoke self-report item                                 | 3     |                     |         |         | x       | x       |
| Productivity                                  | WPAI:GH                                                  | 6     |                     |         |         | x       | x       |
| Process Measures                              |                                                          |       |                     |         |         |         |         |
| Perceptions of practitioner empathy           | CARE <sup>9</sup>                                        | 10    |                     | X       |         |         |         |
| Perceptions of practitioner optimism          | Bespoke item                                             | 1     |                     | X       |         |         |         |
| Treatment expectations                        | Treatment expectation questionnaire TEX-Q <sup>10</sup>  | 15    |                     | X       |         |         |         |
| Anxiety                                       | HADS <sup>11 12</sup>                                    | 7     |                     | X       |         |         |         |
| Continuity of care                            | Patient-Doctor Depth of Relationship Scale <sup>13</sup> | 9     |                     | X       |         |         |         |
| Depression                                    | HADS <sup>11 12</sup>                                    | 7     |                     | X       |         |         |         |
| Sociodemographic Characteristics              |                                                          |       |                     |         |         |         |         |
| Age, gender, ethnicity                        |                                                          | 3     | x                   |         |         |         |         |
| Index of Multiple Deprivation                 | Postcode                                                 | 1     | x                   |         |         |         |         |
| Health Characteristics                        |                                                          |       |                     |         |         |         |         |
| Reasons for consulting                        |                                                          | 1     |                     | x       |         |         |         |
| Comorbidities                                 |                                                          | 1     |                     | x       |         |         |         |
| Index consultation modality                   |                                                          | 1     |                     | x       |         |         |         |

Table 2. Practitioner-Reported Characteristics, Outcomes and Process Variables

| Practitioners         | Variable                                                                             | Measure                         | Items | Measurement Timings |      |      |       |
|-----------------------|--------------------------------------------------------------------------------------|---------------------------------|-------|---------------------|------|------|-------|
|                       |                                                                                      |                                 |       | Baseline            | +2wk | +8wk | +34wk |
| All                   | Characteristics (age, gender, ethnicity, years qualified, profession)                | Bespoke                         | 5     | x                   |      |      |       |
| All                   | Practitioner self-efficacy for conveying clinical empathy                            | Bespoke, from feasibility study | 7     | X                   |      | X    | x     |
| All                   | Practitioner self-efficacy for conveying realistic optimism                          | Bespoke, from feasibility study | 5     | x                   |      | X    | x     |
| Intervention arm only | Practitioner outcome expectancy for implementing goals set during EMPathicO training | Bespoke, from feasibility study | 16    | X                   |      | X    | x     |
| Intervention arm only | Practitioner intentions to implement goals set during EMPathicO training             | Bespoke, from feasibility study | 3     | X                   |      | X    | x     |
| Intervention arm only | Practitioner intervention usage                                                      | LifeGuide data                  | N/A   |                     |      | X    | X     |
| All                   | Practitioner-reported other training                                                 | Bespoke                         | 1     |                     |      | x    | x     |

## References

1. Keller S, Bann CM, Dodd SL, et al. Validity of the Brief Pain Inventory for use in documenting the outcomes of patients with noncancer pain. *Clin J Pain* 2004;20(5):309-18.
2. Howie JG, Heaney DJ, Maxwell M, et al. A comparison of a Patient Enablement Instrument (PEI) against two established satisfaction scales as an outcome measure of primary care consultations. *Fam Pract* 1998;15(2):165-71.
3. Fischer D, Stewart AL, Bloch DA, et al. Capturing the Patient's View of Change as a Clinical Outcome Measure. *JAMA* 1999;282(12):1157-62. doi: 10.1001/jama.282.12.1157
4. Meakin R, Weinman J. The 'Medical Interview Satisfaction Scale' (MISS-21) adapted for British general practice. *Fam Pract* 2002;19(3):257-63. doi: 10.1093/fampra/19.3.257
5. Herdman M, Gudex C, Lloyd A, et al. Development and preliminary testing of the new five-level version of EQ-5D (EQ-5D-5L). *Qual Life Res* 2011;20(10):1727-36. doi: 10.1007/s11136-011-9903-x [published Online First: 2011/04/12]
6. Al-Janabi H, Flynn TN, Coast J. Development of a self-report measure of capability wellbeing for adults: the ICECAP-A. *Qual Life Res* 2012;21(1):167-76. doi: 10.1007/s11136-011-9927-2 [published Online First: 2011/05/21]
7. Keeley T, Coast J, Nicholls E, et al. An analysis of the complementarity of ICECAP-A and EQ-5D-3 L in an adult population of patients with knee pain. *Health and quality of life outcomes* 2016;14:36. doi: 10.1186/s12955-016-0430-x [published Online First: 2016/03/05]
8. Garfield K, Husbands S, Thorn JC, et al. Development of a brief, generic, modular resource-use measure (ModRUM): cognitive interviews with patients. *BMC Health Serv Res* 2021;21(1):371. doi: 10.1186/s12913-021-06364-w
9. Mercer SW, Maxwell M, Heaney D, et al. The development and preliminary validation of the Consultation and Relational Empathy (CARE) measure: an empathy-based consultation process measure. *Fam Pract* 2004;21 699-705.
10. Alberts J, Löwe B, Glahn MA, et al. Development of the generic, multidimensional Treatment Expectation Questionnaire (TEX-Q) through systematic literature review, expert surveys and qualitative interviews. *BMJ Open* 2020;10(8):e036169. doi: 10.1136/bmjopen-2019-036169
11. Bjelland I, Dahl AA, Haug TT, et al. The validity of the Hospital Anxiety and Depression Scale: An updated literature review. *J Psychosom Res* 2002;52(2):69-77.
12. Zigmond AS, Snaith RP. The Hospital Anxiety and Depression Scale. *Acta Psychiatr Scand* 1983;67(6):361-70.
13. Ridd MJ, Lewis G, Peters TJ, et al. Patient-Doctor Depth-of-Relationship Scale: Development and Validation. *The Annals of Family Medicine* 2011;9(6):538. doi: 10.1370/afm.1322
